# Supplementary material for: A kinetic model for two-step phase transformation of hydrothermally treated nanocrystalline anatase
Source: Royal Society of Chemistry journal article supplement (doi:10.1039/c6ce00022c), 2016-01-01
Supplement: c6ce00022c1.pdf [file c6ce00022c1.pdf]

Electronic Supporting Information

A Kinetic Model for Two-Step Phase  
Transformation of Hydrothermally Treated  
Nanocrystalline Anatase

**Kairat Sabyrov<sup>a</sup> and R. Lee Penn<sup>\*b</sup>**

*<sup>a</sup>Materials Sciences Division, Lawrence Berkeley National Laboratory, 1 Cyclotron Road,  
Berkeley, California, United States.*

*<sup>b</sup>Department of Chemistry, University of Minnesota, 207 Pleasant Street SE, Minneapolis,  
Minnesota, United States.*

*\* To whom correspondence should be addressed. Tel: +1 612 626 4680; E-  
mail: rleepenn@umn.edu*

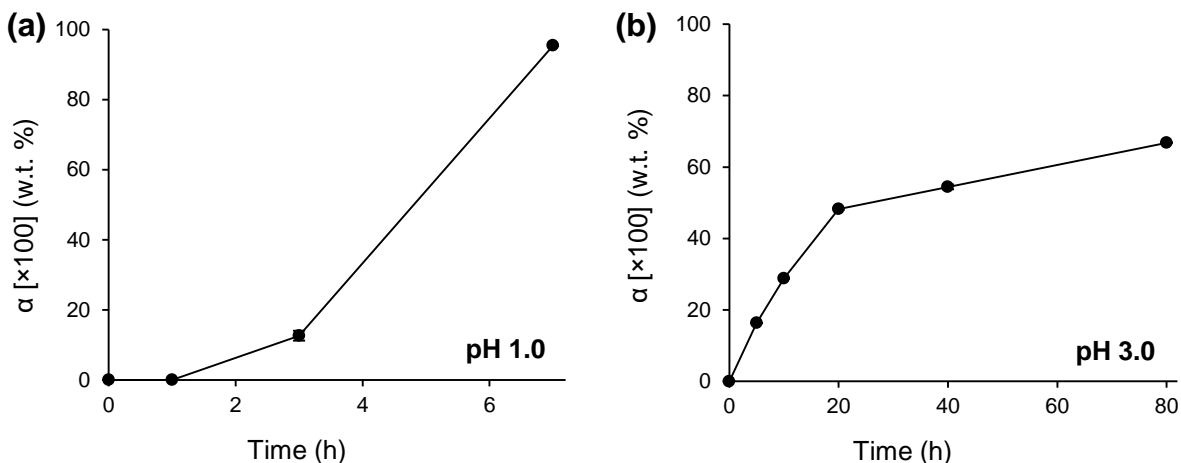

**Fig. S1** Weight percentage transformation as a function of aging time at pH 1.0 (a) and 3.0 (b).

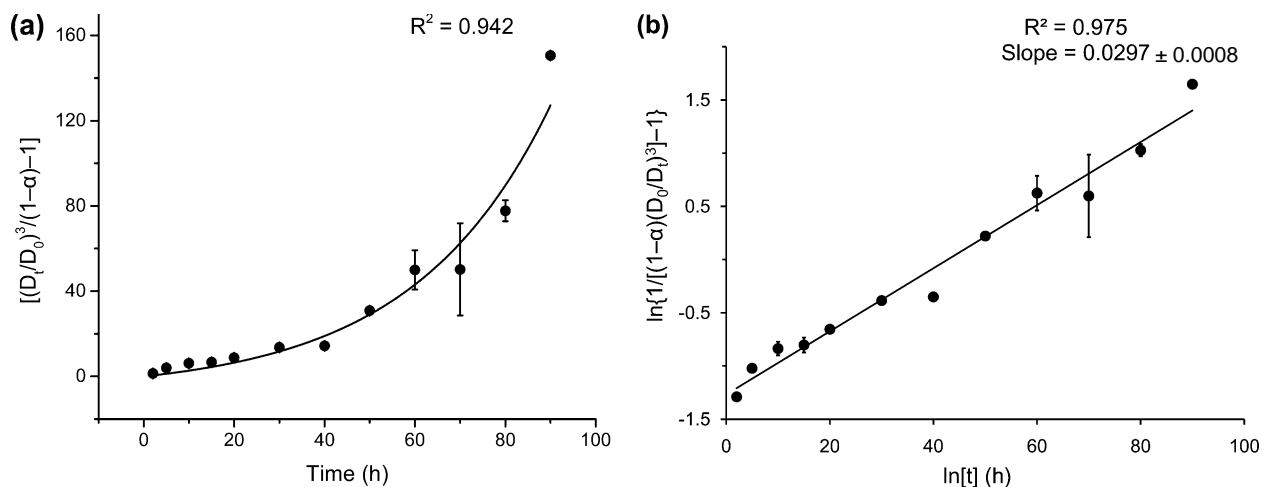

**Fig. S2** Plots presenting the application of combined kinetic model on anatase to rutile phase transformation at 200 °C and pH 1.0. Non-linear (a) and linear (b) regression curve fit performed on the experimental data using eqn 5 and 4, respectively.  $R^2$  values are shown to indicate how well the data points fitted the equations.

#### Derivation of combined kinetic model (eqn 4)

It has been demonstrated that the kinetics of dissolution-precipitation (DP) and interface-nucleation (IN) are first and second order with respect to number of anatase nanoparticles ( $N$ ),<sup>1,2</sup> respectively. Subsequently, the combination of these two models can be expressed by the kinetic equation (eqn 3):

$$-\frac{dN}{dt} = k_{\text{DP}}N + k_{\text{IN}}N^2 \quad (3)$$

where  $k_{\text{DP}}$  and  $k_{\text{IN}}$  are rate constants for DP and IN, respectively. After rearranging the equation, eqn S1 is obtained:

$$-\frac{dN}{N} = k_{\text{DP}}dt + k_{\text{IN}}Ndt \quad (\text{S1})$$

As  $dt$  can be expressed in terms of  $N$  according to the relation:

$$dt = -\frac{dN}{k_{\text{DP}}N + k_{\text{IN}}N^2} \quad (\text{S2})$$

substituting  $dt$  into the second term ( $k_{\text{IN}}Ndt$ ) of the eqn S1 and rearranging the equation lead to the following expression:

$$\frac{k_{\text{IN}}dN}{k_{\text{DP}} + k_{\text{IN}}N} - \frac{dN}{N} = k_{\text{DP}}dt \quad (\text{S3})$$

Eqn S4 can be derived by integrating eqn S3 from  $N_0$  to  $N_t$  and from  $t = 0$  to  $t$  and rearranging it:

$$\ln \left[ k_{\text{DP}} \frac{N_0}{N_t} + k_{\text{IN}}N_0 \right] = k_{\text{DP}}t + \ln(k_{\text{DP}} + k_{\text{IN}}N_0) \quad (\text{S4})$$

Finally, the combined kinetic model (eqn 4) is derived by substituting  $N_0/N_t$  of eqn S4 with right-hand-side of eqn S5 (the derivation of eqn S5 is presented in the reference article):<sup>2</sup>

$$\frac{N_0}{N_t} = \frac{(D_t / D_0)^3}{(1 - \alpha)} \quad (\text{S5})$$

### Derivation of percent ratio of $R_{\text{IN}}$ to $R_{\text{TOT}}$ (eqn 6)

The percent ratio of the rate by IN ( $R_{\text{IN}}$ ) to the total rate ( $R_{\text{TOT}}$ ) can be expressed in terms of the following expression:

$$\frac{R_{\text{IN}}}{R_{\text{TOT}}} \cdot 100 = \frac{k_{\text{IN}}N_t^2}{k_{\text{DP}}N_t + k_{\text{IN}}N_t^2} \cdot 100 \quad (\text{S6})$$

Then, the final form of the percent ratio (eqn 6) can be derived from eqn S6 using eqn S5 and eqn 5 as follows:

$$\begin{aligned} \frac{R_{\text{IN}}}{R_{\text{TOT}}} \cdot 100 &= \frac{k_{\text{IN}}}{\frac{k_{\text{DP}}}{N_t} + k_{\text{IN}}} \cdot 100 = \frac{k_{\text{IN}}}{\frac{k_{\text{DP}}}{N_0} \left[ \frac{N_0}{N_t} \right] + k_{\text{IN}}} \cdot 100 = \frac{k_{\text{IN}}}{\frac{k_{\text{DP}}}{N_0} \left[ \frac{(D_t / D_0)^3}{1 - \alpha} \right] + k_{\text{IN}}} \cdot 100 = \\ &= \frac{k_{\text{IN}}}{\frac{k_{\text{DP}}}{N_0} \left[ \left( 1 + \frac{k_{\text{IN}} N_0}{k_{\text{DP}}} \right) (e^{k_{\text{DP}} t} - 1) + 1 \right] + k_{\text{IN}}} \cdot 100 = \frac{k_{\text{IN}}}{\left[ \frac{k_{\text{DP}} \cdot e^{k_{\text{DP}} t}}{N_0} + k_{\text{IN}} \cdot e^{k_{\text{DP}} t} \right]} \cdot 100 = \frac{k_{\text{IN}} N_0 \cdot e^{-k_{\text{DP}} t}}{(k_{\text{DP}} + k_{\text{IN}} N_0)} \cdot 100 \end{aligned}$$

## References

- 1 K. Sabyrov, N. D. Burrows and R. L. Penn, *Chem. Mater.*, 2012, **25**, 1408-1415.
- 2 H. Zhang and J. F. Banfield, *Am. Mineral.*, 1999, **84**, 528-535.
